# Supplementary material for: Diversification of Type VI Secretion System Toxins Reveals Ancient Antagonism among Bee Gut Microbes
Source: PubMed Central journal article supplement (PMC5727410; doi:10.1128/mbio.01630-17), 2017-12-12

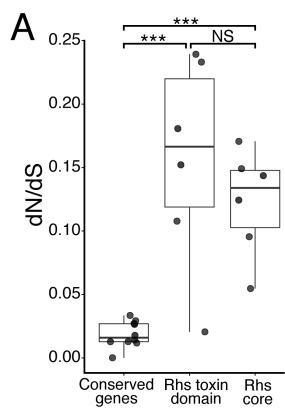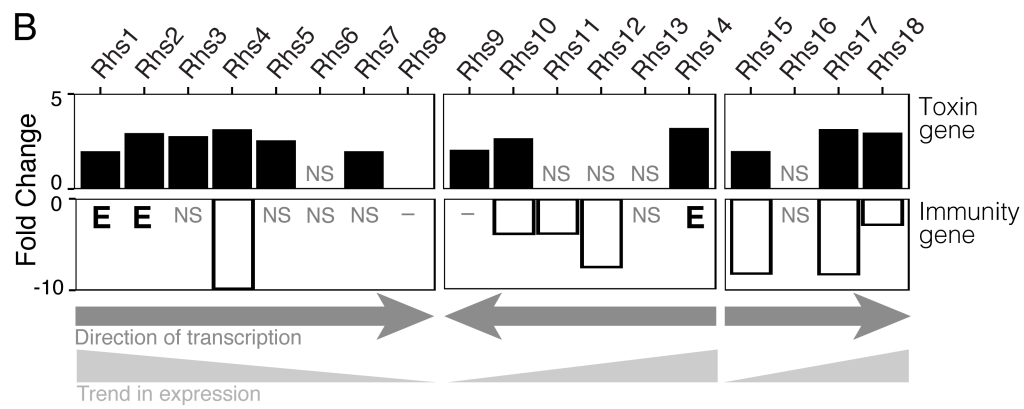

Supplement: mbo006173631sf4.pdf [file mbo006173631sf4.pdf]
